# Supplementary material for: Genetic engineering cellular vesicles expressing CD64 as checkpoint antibody carrier for cancer immunotherapy
Source: PubMed Central journal article supplement (PMC8058713; doi:10.7150/thno.48868), 2021-04-07
Supplement: thnov11p6033s1.pdf [file thnov11p6033s1.pdf]

## Supporting Information

### **Genetic engineering cellular vesicles expressing CD64 as checkpoint antibody carrier for cancer immunotherapy**

Liyan Li<sup>[a#]</sup>, Qianwei Miao<sup>[d#]</sup>, Fanqiang Meng<sup>[a#]</sup>, Baoqi Li<sup>[a]</sup>, Tianyuan Xue<sup>[a]</sup>, Tianliang Fang<sup>[a]</sup>, Zhirang Zhang<sup>[a]</sup>, Jinjie Zhang<sup>[c]</sup>, Xinyu Ye<sup>[d]</sup>, Yang Kang<sup>[c]</sup>, Xingding Zhang<sup>[a]</sup>, Qian Chen<sup>[f]</sup>, Xin Liang<sup>[b, g\*]</sup>, Hongbo Chen<sup>[c\*]</sup>, Xudong Zhang<sup>[a\*]</sup>

<sup>a</sup>. Department of Pharmacology, Molecular Cancer Research Center, School of Medicine, Sun Yat-Sen University, Guangzhou/Shenzhen, China

<sup>b</sup>. Guangdong Provincial Key Laboratory of Medical Molecular Diagnostics, Key Laboratory of Stem Cell and Regenerative Tissue Engineering, School of Basic Medical Sciences, Guangdong Medical University, Dongguan 523808, China.

<sup>c</sup>. School of Pharmaceutical Sciences (Shenzhen), Sun Yat-Sen University, Shenzhen, P.R. China.

<sup>d</sup>. School of Life Sciences, Tsinghua University, Beijing 100084, P.R. China.

<sup>e</sup>. The Seventh Affiliated Hospital, Sun Yat-sen University, Shenzhen, 518107, China.

<sup>f</sup>. Institute of Functional Nano & Soft Materials (FUNSOM), Soochow University, Suzhou, 215325, P.R. China.

<sup>g</sup>. Center for Experimental Medicine (CEM), University of Chinese Academy of Sciences-Shenzhen Hospital, Shenzhen 518000, P. R. China

<sup>#</sup>These authors contributed equally to this work.

\*Corresponding Author: E-mail: zhangxd56@mail.sysu.edu.cn

E-mail: chenhb7@mail.sysu.edu.cn

E-mail: liangx55@mail.sysu.edu.cn

## Supplementary Figures

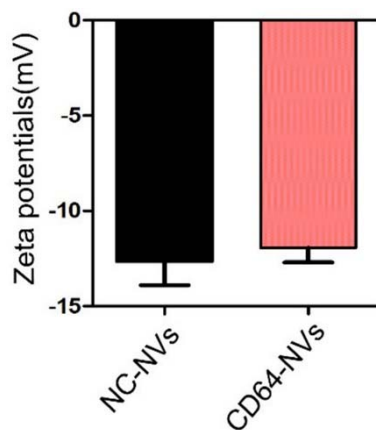

**Figure S1.** The zeta potential of the CD64-NVs. NC: non-transfecting control, worked as a negative control.

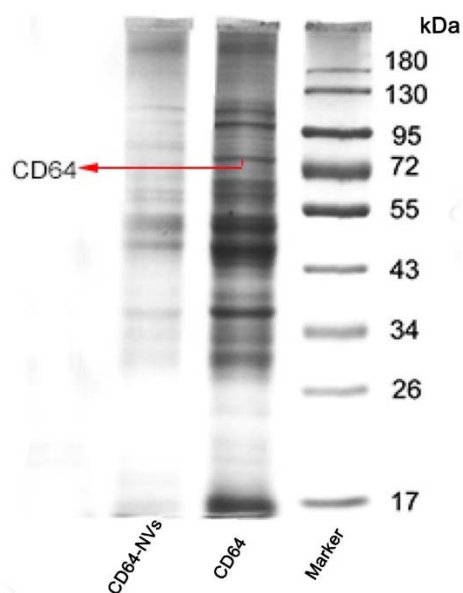

**Figure S2.** The expression of CD64 on the NVs. The image of staining with coomassie brilliant blue showed that the existence of CD64 on the NVs.

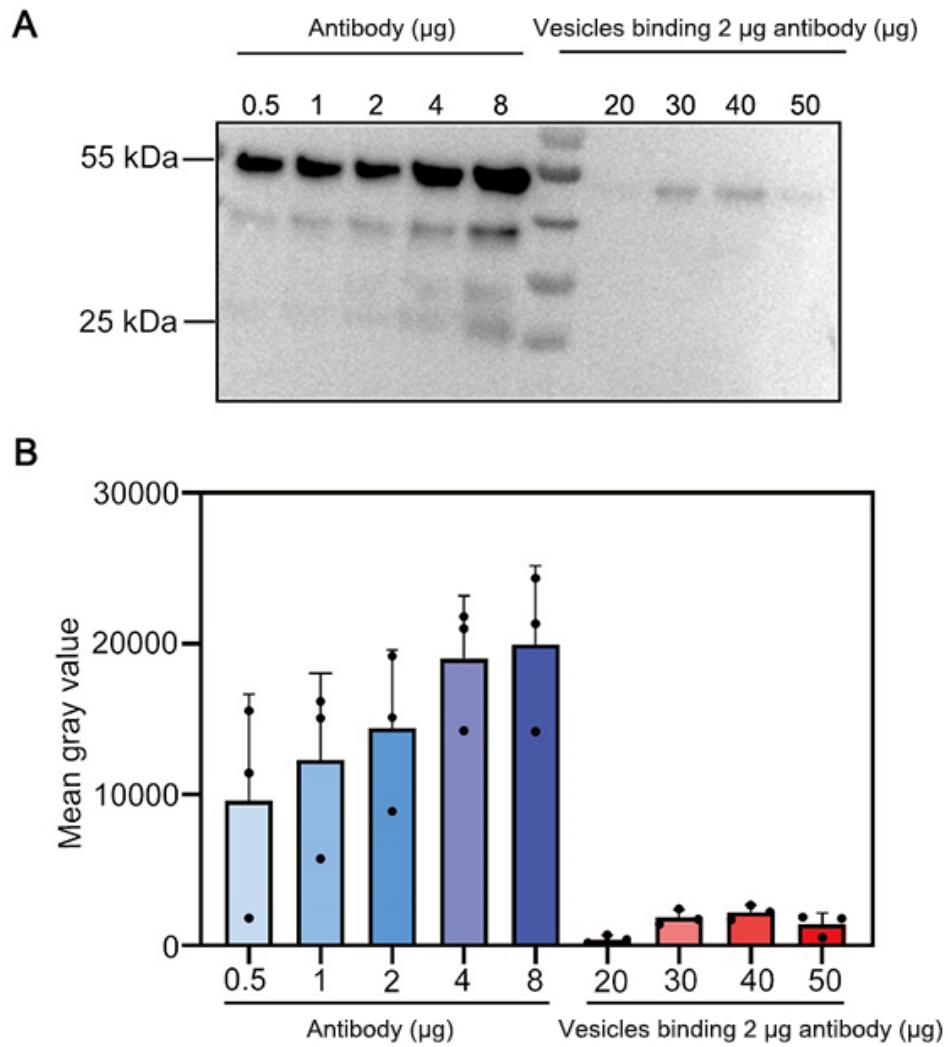

**Figure S3.** (A) Western blot analysis was used to examine different dosages of CD64-NVs binding to 2  $\mu\text{g}$  PD-L1 antibody. 0.5, 1, 2, 4, 8  $\mu\text{g}$  PD-L1 antibodies were used as standard control. (B) Quantitative analysis of band intensity by WB ( $n=3$ ). Error bar, mean  $\pm$  s.d.#

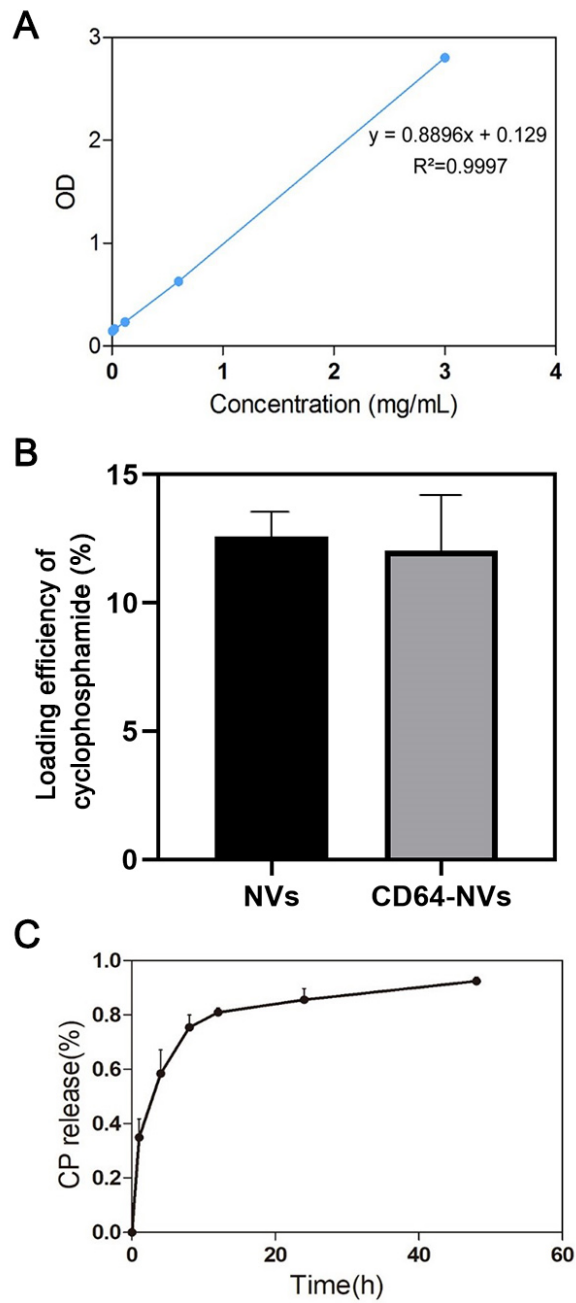

**Figure S4.** CP released from CD64-NVs-CP at different time points. (A) The Standard curve of CP. (B) CP loading in NVs and CD64-NVs ( $n=3$ ). Error bar, mean  $\pm$  s.d. (C) The release of CP at different time points.

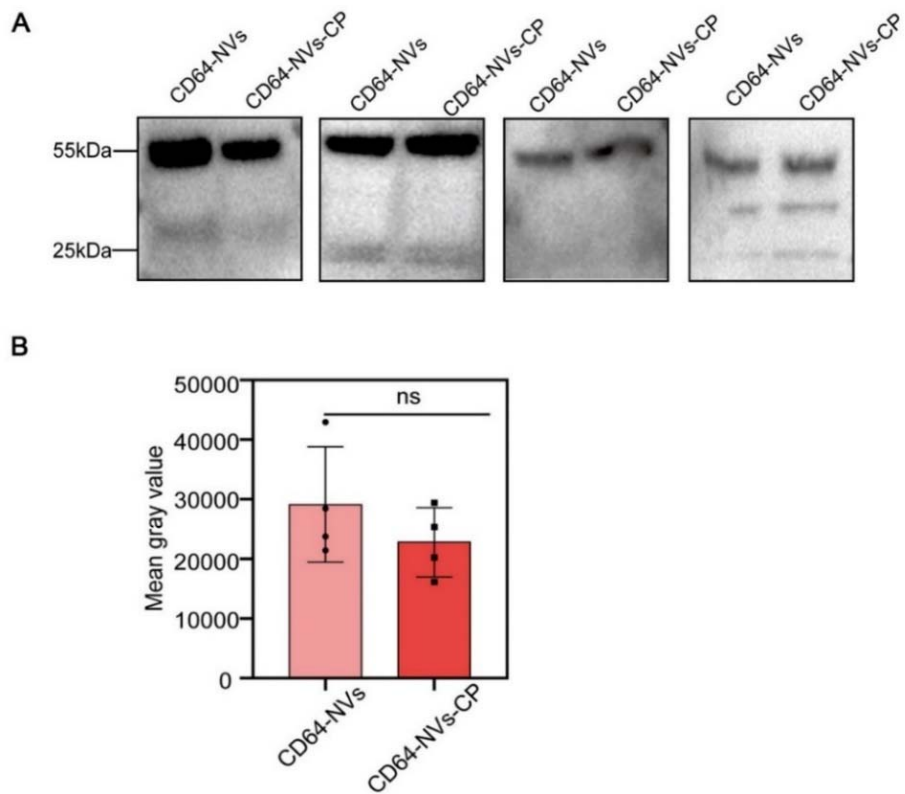

**Figure S5.** (A) Western blot was used to detect the effect of the loading of CP on the binding ability of CD64-NVs to PD-L1 antibody ( $n=4$ ). 55 kDa represented the heavy chain of PD-L1 antibody, 25 kDa represented the light chain of PD-L1 antibody. (B) Mean gray value analysis of band intensity by WB ( $n=4$ ).

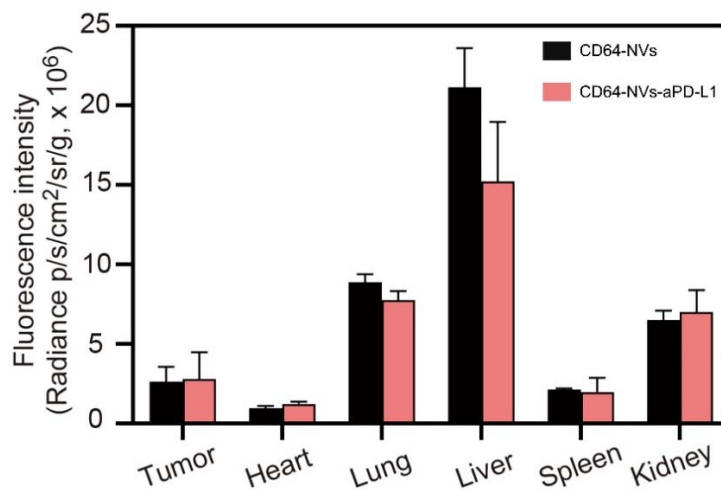

**Figure S6.** Fluorescence intensity per gram tissue in tumor and major organs measured ( $n=3$ ). Error bar, mean  $\pm$  s.d.

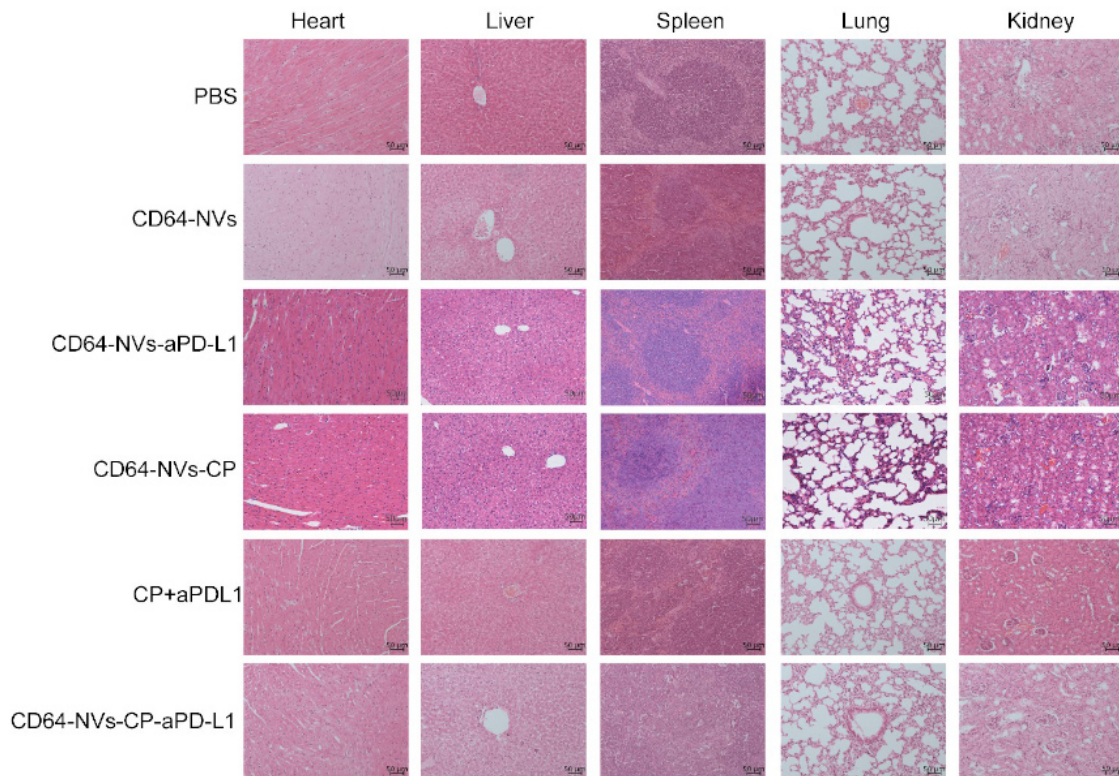

**Figure S7.** The image of H&E staining obtained from heart, liver, spleen, lung and kidney of mice treated with PBS, CD64-NVs, CD64-NVs-aPD-L1, CD64-NVs-CP, CP+aPD-L1 and CD64-NVs-CP-aPD-L1, respectively. Scale bars: 50  $\mu$ m.
